# Supplementary material for: Impact of COVID-19 and Mitigation Plans on Essential Health Services: Institutional Experience of St. Paul’s Hospital Millennium Medical College
Source: Research Square preprint supplement (doi:10.21203/rs.3.rs-604989/v1), 2021-06-28
Supplement: Supplementary file 1 [file a41e66548e2bf8c5fd33b39f.docx]

**Annex - 1: Consent form**

**Information sheet: Give the form to the respondents to read or read the statements**

**Purpose of the research:**

Hello, First of all; we would like to thank you for your time. We are working in a research team led by Dr. Berhanetsehay Teklewold, Dr. Firaol Dandena and Dr. Dagmawi Anteneh in Saint Paul’s Hospital Millennium Medical College. The research team is conducting a study on **“Impact of Covid-19 and Mitigation Plans on Essential Health Services: Institutional Experience of St. Paul’s Hospital Millennium Medical College**”.

You have been identified as one participant in this study and you will be kindly requested to comply with the interviewer-administered questionnaire for the study purpose.

**Procedure:**

In order to collect our data, we invite you to take part in our study. If you are willing, you need to understand and give your written consent. We will ask most questions to the hospital management team regarding the mitigation plans taken during the emergence of the pandemic in the country. You do not need to tell your name on the interview and all your responses, and the results obtained will be kept confidentially by using coding system whereby no one will have access to your response.

**Risk and /or discomfort:**

There are no risks associated with participating in this research except possibly time cost.

**Benefits:**

If you are willing to participate in this research, there may not be direct benefit to you but your participation is likely help us meet the research objective and remedy the obstacles that health care facilities face during this pandemic and share best practice to other institutions.

**Incentives/payments for participating:**

You will not be provided with any incentive or payment to take part in this study.

**Confidentiality:**

The information collected from this research will be kept confidential. Information will be stored in a file, without your name, only code number is used. It will not be revealed to anyone except the principal investigator.

**Right to ask questions:**

Do not hesitate to ask questions if you are in need.

**Right to refusal or withdraw:**

You have the full right to refuse from participating in this research. You can choose not to respond to some or all question if you do not want to give your response. You also have full right to withdraw from this study at any time you wish. Your refusal will not affect you by any means.

**Person to contact:**

This research was reviewed and approved by the Institutional research review board (IRB) of Saint Paul’s hospital millennium medical college. In case you need more information about the study you can contact:-

Dr. Berhanetsehay Teklewold, Dr. Firaol Dandena and Dr. Dagmawi Anteneh

Tel: - +251911482646/+25123830865/+251927159820

Email: berhanetsehay.teklewold@sphmmc.edu.et

firadandena123@ gmail.com

dagmawianteneh16@ gmail.com

**Informed consent:**

I have understood the objective of the study and agreed to be included in the study as explained by the researchers. I also understand that I am at autonomy to withdraw from the study at any time.

Written consent given:

Name__________________________

Signature________________________

Date ___________________________

Name and signature of data collector

Name____________________________

Signature_________________________

Date _____________________________

**Annex – 2: Data abstraction tool**

Dear data collectors, you are kindly requested to look thoroughly the information from patient’s registry books in different service areas, ask interview questions, observe service areas of the hospital and fill the information needed in to prepared format.

**Part –Ι: Data to be collected from Health Management Information System (HMIS) monthly report of service areas/units**

**A: Monthly number of client visiting to essential healthcare units of SPHMMC in pre-COVID season**

| **Essential healthcare type** | **May 2019** | **June 2019** | **July 2019** | **August 2019** | **September 2019** | **October 2019** |
| --- | --- | --- | --- | --- | --- | --- |
| **Outpatient**  **services** |  |  |  |  |  |  |
| Internal Medicine |  |  |  |  |  |  |
| Surgery |  |  |  |  |  |  |
| Gynecology |  |  |  |  |  |  |
| Dermatology |  |  |  |  |  |  |
| Dental & Maxillofacial |  |  |  |  |  |  |
| Ophthalmology |  |  |  |  |  |  |
| Psychiatry |  |  |  |  |  |  |
| Ear Nose & Throat (ENT) |  |  |  |  |  |  |
| Renal Transplant |  |  |  |  |  |  |
| Palliative care |  |  |  |  |  |  |
| Oncology |  |  |  |  |  |  |
| Pediatrics |  |  |  |  |  |  |
| **Emergency**  **services** |  |  |  |  |  |  |
| Pediatric Emergency |  |  |  |  |  |  |
| Adult Emergency |  |  |  |  |  |  |
| Gynecology Emergency |  |  |  |  |  |  |
| AaBET Emergency |  |  |  |  |  |  |
| **Other services** |  |  |  |  |  |  |
| Family planning |  |  |  |  |  |  |
| Cervical cancer screening |  |  |  |  |  |  |
| Voluntary Counselling & Testing |  |  |  |  |  |  |
| Post Exposure Prophylaxis |  |  |  |  |  |  |
| Dialysis |  |  |  |  |  |  |
| **Maternal Service** |  |  |  |  |  |  |
| Spontaneous Vaginal Delivery |  |  |  |  |  |  |
| Instrumental delivery |  |  |  |  |  |  |
| Caesarean section |  |  |  |  |  |  |
| Maternal death |  |  |  |  |  |  |
| Antenatal care |  |  |  |  |  |  |
| Postnatal care |  |  |  |  |  |  |
| **Surgical Service** |  |  |  |  |  |  |
| Emergency surgery |  |  |  |  |  |  |
| Elective surgery |  |  |  |  |  |  |
| **Inpatient Service** |  |  |  |  |  |  |
| Surgical ward |  |  |  |  |  |  |
| Medical ward |  |  |  |  |  |  |
| Pediatrics ward |  |  |  |  |  |  |
| Maternity ward |  |  |  |  |  |  |
| Gynecology ward |  |  |  |  |  |  |
| **Others** |  |  |  |  |  |  |
| **Total inpatient admission** |  |  |  |  |  |  |

**B: Monthly number of client visiting to essential healthcare units of SPHMMC in COVID season**

| **Essential healthcare type** | **May 2019** | **June 2020** | **July 2020** | **August 2020** | **September 2020** | **October 2020** |
| --- | --- | --- | --- | --- | --- | --- |
| **Outpatient**  **services** |  |  |  |  |  |  |
| Internal Medicine |  |  |  |  |  |  |
| Surgery |  |  |  |  |  |  |
| Gynecology |  |  |  |  |  |  |
| Dermatology |  |  |  |  |  |  |
| Dental & Maxillofacial |  |  |  |  |  |  |
| Ophthalmology |  |  |  |  |  |  |
| Psychiatry |  |  |  |  |  |  |
| Ear Nose & Throat (ENT) |  |  |  |  |  |  |
| Renal Transplant |  |  |  |  |  |  |
| Palliative care |  |  |  |  |  |  |
| Oncology |  |  |  |  |  |  |
| Pediatrics |  |  |  |  |  |  |
| **Emergency**  **services** |  |  |  |  |  |  |
| Pediatric Emergency |  |  |  |  |  |  |
| Adult Emergency |  |  |  |  |  |  |
| Gynecology Emergency |  |  |  |  |  |  |
| AaBET Emergency |  |  |  |  |  |  |
| **Other services** |  |  |  |  |  |  |
| Family planning |  |  |  |  |  |  |
| Cervical cancer screening |  |  |  |  |  |  |
| Voluntary Counselling & Testing |  |  |  |  |  |  |
| Post Exposure Prophylaxis |  |  |  |  |  |  |
| Dialysis |  |  |  |  |  |  |
| **Maternal Service** |  |  |  |  |  |  |
| Spontaneous Vaginal Delivery |  |  |  |  |  |  |
| Instrumental delivery |  |  |  |  |  |  |
| Caesarean section |  |  |  |  |  |  |
| Maternal death |  |  |  |  |  |  |
| Antenatal care |  |  |  |  |  |  |
| Postnatal care |  |  |  |  |  |  |
| **Surgical Service** |  |  |  |  |  |  |
| Emergency surgery |  |  |  |  |  |  |
| Elective surgery |  |  |  |  |  |  |
| **Inpatient Service** |  |  |  |  |  |  |
| Surgical ward |  |  |  |  |  |  |
| Medical ward |  |  |  |  |  |  |
| Pediatrics ward |  |  |  |  |  |  |
| Maternity ward |  |  |  |  |  |  |
| Gynecology ward |  |  |  |  |  |  |
| **Others** |  |  |  |  |  |  |
| **Total inpatient admission** |  |  |  |  |  |  |

**Part- ΙΙ: Hospital Service area observation**

1. What new structural arrangement made (changed) after the emergence of Covid-19?
2. What work process changes seen in the hospital after the emergence of Covid-19?
3. What healthcare services were added/modified/omitted after the emergence of Covid-19?
4. What Monitoring and evaluation tools used on essential health service provision after the emergence of Covid-19?

**Part- ΙΙΙ: Hospital management team interview**

1. What new structural arrangement made (changed) after the emergence of Covid-19?
2. What work process changes made in the hospital after the emergence of Covid-19?
3. What healthcare services were added/modified/omitted after the emergence of Covid-19?
4. What Monitoring and evaluation tools used on essential health service provision after the emergence of Covid-19?
5. What effective measures taken on essential health service provision (Human resource management, Finance, Procurement, PPE utilization) after the emergence of Covid-19?

**Part- ΙV: Document, protocol, SOP, TOR, rule and regulation review?**

1. What new structural arrangement made (changed) after the emergence of Covid-19?
2. What work process changes made in the hospital after the emergence of Covid-19?
3. What healthcare services were added/modified/omitted after the emergence of Covid-19?
4. What Monitoring and evaluation tools used on essential health service provision after the emergence of Covid-19?
